# Supplementary material for: Three New Pigment Protein Tyrosine Phosphatases Inhibitors from the Insect Parasite Fungus Cordyceps gracilioides: Terreusinone A, Pinophilin C and Cryptosporioptide A
Source: PubMed Central journal article supplement (PMC6272775; doi:10.3390/molecules20045825), 2015-04-02
Supplement: molecules-20-05825-s001.pdf [file molecules-20-05825-s001.pdf]

# Supplementary Materials

WPY-42

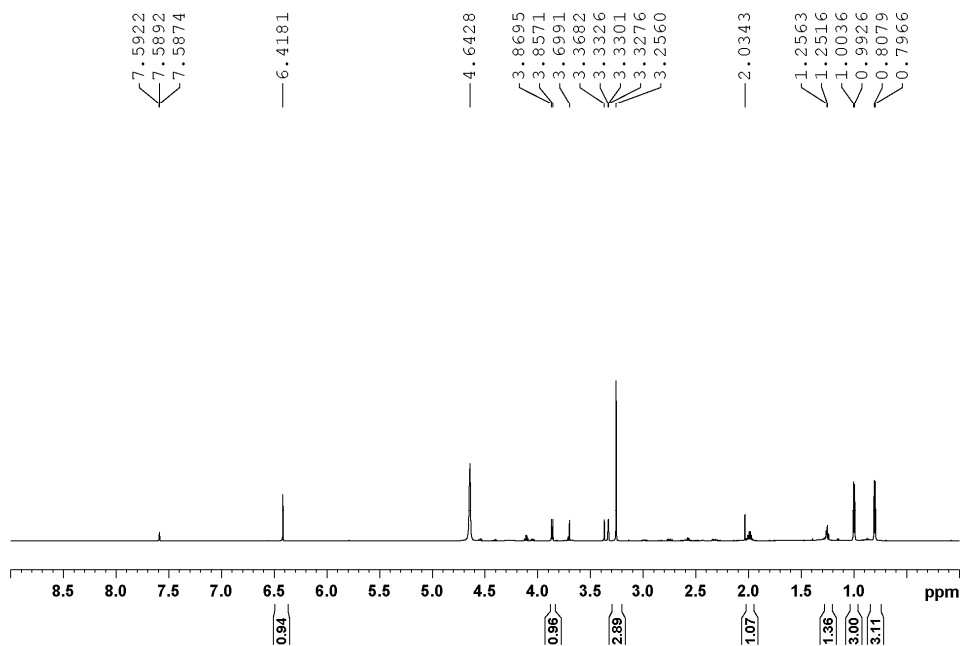

Figure S1.  $^1\text{H-NMR}$  of **1**.

WPY-42dept135

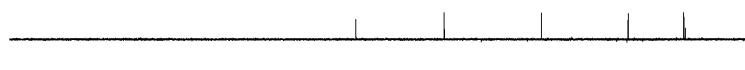

WPY-42dept90

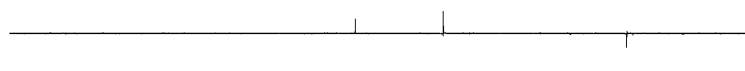

WPY-42

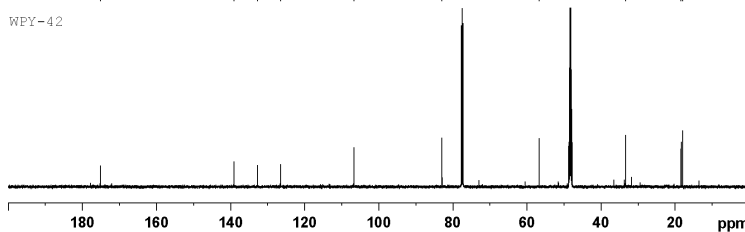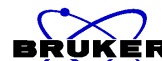

```

NAME          WPY-42
EXPNO         2
PROCNO        2
Date_         20130227
Time          12:11
INSTRUM       spect
PROBHD        5 mm PABBO QNP
PULPROG       zgpg30
TD            65536
SOLVENT       MeCO
SOLVENT2
NS            4
DS            4
F2          36051.699 Hz
F1          0.33107 Hz
AQ          0.9988155 sec
RG           3000
SW           13.467 usec
DE           2.50 usec
TE           300.2 K
D1           2.0000000 sec
D11          0.0300000 sec
TD0           3

===== CHANNEL f1 =====
NUC1          13C
P1            10.00 usec
PL1           -1.00 dB
SFO1          101.6251250 MHz
SFO2          150.922872 MHz

===== CHANNEL f2 =====
CPDPRG2       waltz16
NUC2          1H
PCPD2         70.00 usec
PL2           -1.00 dB
PL12          13.46 dB
PL13          13.46 dB
PL14          13.46 dB
PL15          13.46 dB
PL16          13.46 dB
PL17          13.46 dB
PL18          13.46 dB
PL19          13.46 dB
PL20          13.46 dB
PL21          13.46 dB
PL22          13.46 dB
PL23          13.46 dB
PL24          13.46 dB
PL25          13.46 dB
PL26          13.46 dB
PL27          13.46 dB
PL28          13.46 dB
PL29          13.46 dB
PL30          13.46 dB
PL31          13.46 dB
PL32          13.46 dB
PL33          13.46 dB
PL34          13.46 dB
PL35          13.46 dB
PL36          13.46 dB
PL37          13.46 dB
PL38          13.46 dB
PL39          13.46 dB
PL40          13.46 dB
PL41          13.46 dB
PL42          13.46 dB
PL43          13.46 dB
PL44          13.46 dB
PL45          13.46 dB
PL46          13.46 dB
PL47          13.46 dB
PL48          13.46 dB
PL49          13.46 dB
PL50          13.46 dB
PL51          13.46 dB
PL52          13.46 dB
PL53          13.46 dB
PL54          13.46 dB
PL55          13.46 dB
PL56          13.46 dB
PL57          13.46 dB
PL58          13.46 dB
PL59          13.46 dB
PL60          13.46 dB
PL61          13.46 dB
PL62          13.46 dB
PL63          13.46 dB
PL64          13.46 dB
PL65          13.46 dB
PL66          13.46 dB
PL67          13.46 dB
PL68          13.46 dB
PL69          13.46 dB
PL70          13.46 dB
PL71          13.46 dB
PL72          13.46 dB
PL73          13.46 dB
PL74          13.46 dB
PL75          13.46 dB
PL76          13.46 dB
PL77          13.46 dB
PL78          13.46 dB
PL79          13.46 dB
PL80          13.46 dB
PL81          13.46 dB
PL82          13.46 dB
PL83          13.46 dB
PL84          13.46 dB
PL85          13.46 dB
PL86          13.46 dB
PL87          13.46 dB
PL88          13.46 dB
PL89          13.46 dB
PL90          13.46 dB
PL91          13.46 dB
PL92          13.46 dB
PL93          13.46 dB
PL94          13.46 dB
PL95          13.46 dB
PL96          13.46 dB
PL97          13.46 dB
PL98          13.46 dB
PL99          13.46 dB
PL100         13.46 dB
SFO2          500.1362500 MHz
SF          500.1362500 MHz
WDW           EM
SSB           0
LB           1.00 Hz
GB           0
PC           1.40
    
```

Figure S2.  $^{13}\text{C-NMR}$  of **1**.





## Elemental Composition Report

Page 1

## Single Mass Analysis

Tolerance = 10.0 PPM / DBE: min = -10.0, max = 120.0

Selected filters: None

Monoisotopic Mass, Odd and Even Electron Ions

178 formula(e) evaluated with 3 results within limits (up to 51 closest results for each mass)

Elements Used:

C: 0-200 H: 0-400 N: 0-4 O: 3-9

WPY-42

19:15:24 06-Mar-2014

Voltage EI+

100%

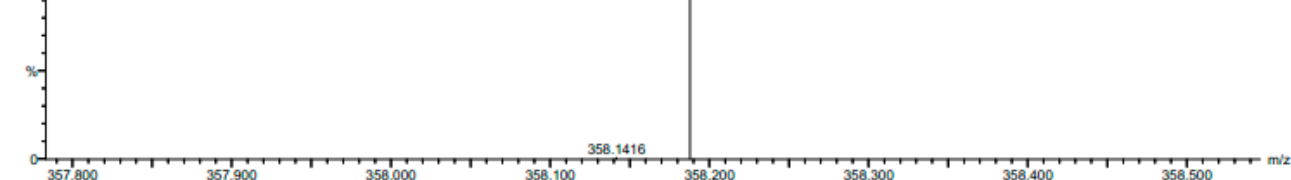

Minimum: -10.0

Maximum: 200.0 10.0 120.0

| Mass     | Calc. Mass | mDa  | PPM  | DBE | i-FIT     | Formula       |
|----------|------------|------|------|-----|-----------|---------------|
| 358.1880 | 358.1893   | -1.3 | -3.6 | 9.0 | 5546169.0 | C20 H26 N2 O4 |
|          | 358.1866   | 1.4  | 3.9  | 4.5 | 5546165.0 | C17 H28 N O7  |
|          | 358.1852   | 2.8  | 7.8  | 5.0 | 5546163.5 | C15 H26 N4 O6 |

Figure S7. Single Mass Analysis of 1.

Table S1. Crystal data and structure refinement for 1\_0m.

| Parameters                        | Data                                                                                                                  |
|-----------------------------------|-----------------------------------------------------------------------------------------------------------------------|
| Identification code               | 1_0m                                                                                                                  |
| Empirical formula                 | C <sub>20</sub> H <sub>26</sub> N <sub>2</sub> O <sub>4</sub>                                                         |
| Formula weight                    | 358.43                                                                                                                |
| Temperature                       | 296(2) K                                                                                                              |
| Wavelength                        | 0.71073 Å                                                                                                             |
| Crystal system                    | Triclinic                                                                                                             |
| Space group                       | P-1                                                                                                                   |
| Unit cell dimensions              | a = 8.3255(10) Å, alpha = 96.166(2)°<br>b = 9.9479(12) Å, beta = 107.299(2)°<br>c = 12.4585(15) Å, gamma = 96.127(2)° |
| Volume, Z                         | 968.9(2) Å <sup>3</sup> , 2                                                                                           |
| Density (calculated)              | 1.229 mg/m <sup>3</sup>                                                                                               |
| Absorption coefficient            | 0.086 mm <sup>-1</sup>                                                                                                |
| F(000)                            | 384                                                                                                                   |
| Crystal size                      | 0.29 mm × 0.28 mm × 0.20 mm                                                                                           |
| θ range for data collection       | 2.08 to 27.00°                                                                                                        |
| Limiting indices                  | -10 < h < 10, -12 < k < 9, -14 < l < 15                                                                               |
| Reflections collected             | 5740                                                                                                                  |
| Independent reflections           | 4139 (Rint = 0.0127)                                                                                                  |
| Completeness to θ = 27.00°        | 97.5%                                                                                                                 |
| Absorption correction             | Semi-empirical from equivalents                                                                                       |
| Max. and min. Transmission        | 0.9831 and 0.9756                                                                                                     |
| Refinement method                 | Full-matrix least-squares on F <sup>2</sup>                                                                           |
| Data/restraints/parameters        | 4139/1/250                                                                                                            |
| Goodness-of-fit on F <sup>2</sup> | 1.742                                                                                                                 |
| Final R indices [I > 2σ(I)]       | R1 = 0.1278, wR2 = 0.4121                                                                                             |
| R indices (all data)              | R1 = 0.1576, wR2 = 0.4386                                                                                             |
| Largest diff. peak and hole       | 1.450 and -1.483 eÅ <sup>-3</sup>                                                                                     |

**Table S2.** Atomic coordinates [ $\times 104$ ] and equivalent isotropic displacement parameters [ $A^2 \times 103$ ] for 1\_0m.  $U(\text{eq})$  is defined as one third of the trace of the orthogonalized  $U_{ij}$  tensor.

|       | <b>x</b> | <b>y</b> | <b>z</b> | <b>U(eq)</b> |
|-------|----------|----------|----------|--------------|
| N(1)  | 567(5)   | 7724(4)  | 818(4)   | 51(1)        |
| N(2)  | 4656(4)  | 2309(3)  | 1252(3)  | 41(1)        |
| O(1)  | 1699(4)  | 7724(4)  | 818(4)   | 51(1)        |
| O(2)  | 3662(9)  | 9403(10) | 3072(13) | 368(12)      |
| O(3)  | 8267(3)  | -280(3)  | 116(3)   | 49(1)        |
| O(4)  | 5850(6)  | 5307(4)  | 2018(4)  | 90(1)        |
| C(1)  | 941(5)   | 4134(4)  | 821(4)   | 45(1)        |
| C(2)  | 1047(5)  | 5618(4)  | 1083(4)  | 47(1)        |
| C(3)  | 1966(6)  | 6527(4)  | 2103(4)  | 53(1)        |
| C(4)  | 1618(6)  | 7813(4)  | 1893(4)  | 56(1)        |
| C(5)  | 180(5)   | 6387(4)  | 324(4)   | 47(1)        |
| C(6)  | 2304(7)  | 9139(5)  | 2662(5)  | 65(1)        |
| C(7)  | 942(9)   | 9910(7)  | 2899(5)  | 96(3)        |
| C(8)  | -56(14)  | 9094(13) | 3449(12) | 208(7)       |
| C(9)  | 1725(14) | 11288(7) | 3623(6)  | 122(3)       |
| C(10) | 5190(9)  | 9118(9)  | 2999(9)  | 129(4)       |
| C(11) | 6811(5)  | -143(4)  | 74(3)    | 39(1)        |
| C(12) | 6346(5)  | 1043(4)  | 655(3)   | 39(1)        |
| C(13) | 7356(5)  | 2194(4)  | 1397(4)  | 48(1)        |
| C(14) | 6279(5)  | 2973(4)  | 1746(4)  | 48(1)        |
| C(15) | 4664(5)  | 1142(4)  | 581(3)   | 38(1)        |
| C(16) | 6666(6)  | 4297(5)  | 2533(4)  | 59(1)        |
| C(17) | 6315(11) | 4169(7)  | 3638(5)  | 91(2)        |
| C(18) | 6961(14) | 3099(9)  | 4181(6)  | 122(3)       |
| C(19) | 6915(15) | 5576(8)  | 4421(6)  | 144(4)       |
| C(20) | 6653(11) | 5873(7)  | 1264(6)  | 103(2)       |

**TableS3.** Bond lengths [Å] and angles [°] for 1\_0m.

---

|               |           |
|---------------|-----------|
| N(1)-C(4)     | 1.352(6)  |
| N(1)-C(5)     | 1.365(5)  |
| N(1)-H(2)     | 0.93(5)   |
| N(2)-C(15)    | 1.358(4)  |
| N(2)-C(14)    | 1.367(5)  |
| N(2)-H(1)     | 0.81(4)   |
| O(1)-C(1)     | 1.231(5)  |
| O(2)-C(6)     | 1.083(7)  |
| O(2)-C(10)    | 1.359(11) |
| O(3)-C(11)    | 1.220(4)  |
| O(4)-C(16)    | 1.381(6)  |
| O(4)-C(20)    | 1.433(8)  |
| C(1)-C(5)#1   | 1.456(6)  |
| C(1)-C(2)     | 1.464(5)  |
| C(2)-C(5)     | 1.367(6)  |
| C(2)-C(3)     | 1.430(6)  |
| C(3)-C(4)     | 1.376(6)  |
| C(3)-H(3)     | 0.9300    |
| C(4)-C(6)     | 1.493(6)  |
| C(5)-C(1)#1   | 1.456(6)  |
| C(6)-C(7)     | 1.515(6)  |
| C(6)-H(6)     | 0.9800    |
| C(7)-C(8)     | 1.460(14) |
| C(7)-C(9)     | 1.520(9)  |
| C(7)-H(7)     | 0.9800    |
| C(8)-H(8A)    | 0.9600    |
| C(8)-H(8B)    | 0.9600    |
| C(8)-H(8C)    | 0.9600    |
| C(9)-H(9A)    | 0.9600    |
| C(9)-H(9B)    | 0.9600    |
| C(9)-H(9C)    | 0.9600    |
| C(10)-H(10A)  | 0.9600    |
| C(10)-H(10B)  | 0.9600    |
| C(10)-H(10C)  | 0.9600    |
| C(11)-C(15)#2 | 1.459(5)  |
| C(11)-C(12)   | 1.465(5)  |
| C(12)-C(15)   | 1.391(5)  |
| C(12)-C(13)   | 1.407(5)  |
| C(13)-C(14)   | 1.379(5)  |
| C(13)-H(13)   | 0.9300    |
| C(14)-C(16)   | 1.497(6)  |
| C(15)-C(11)#2 | 1.459(5)  |
| C(16)-C(17)   | 1.506(8)  |
| C(16)-H(16)   | 0.9800    |
| C(17)-C(18)   | 1.393(10) |
| C(17)-C(19)   | 1.558(8)  |

---

---

|                  |          |
|------------------|----------|
| C(17)-H(17)      | 0.9800   |
| C(18)-H(18A)     | 0.9600   |
| C(18)-H(18B)     | 0.9600   |
| C(18)-H(18C)     | 0.9600   |
| C(19)-H(19A)     | 0.9600   |
| C(19)-H(19B)     | 0.9600   |
| C(19)-H(19C)     | 0.9600   |
| C(20)-H(20A)     | 0.9600   |
| C(20)-H(20B)     | 0.9600   |
| C(20)-H(20C)     | 0.9600   |
| C(4)-N(1)-C(5)   | 109.3(4) |
| C(4)-N(1)-H(2)   | 128(3)   |
| C(5)-N(1)-H(2)   | 122(3)   |
| C(15)-N(2)-C(14) | 110.0(3) |
| C(15)-N(2)-H(1)  | 120(3)   |
| C(14)-N(2)-H(1)  | 130(3)   |
| C(6)-O(2)-C(10)  | 142.8(9) |
| C(16)-O(4)-C(20) | 112.6(5) |
| O(1)-C(1)-C(5)#1 | 124.0(4) |
| O(1)-C(1)-C(2)   | 124.3(4) |
| C(5)#1-C(1)-C(2) | 111.7(3) |
| C(5)-C(2)-C(3)   | 107.2(4) |
| C(5)-C(2)-C(1)   | 122.7(4) |
| C(3)-C(2)-C(1)   | 130.1(4) |
| C(4)-C(3)-C(2)   | 106.1(4) |
| C(4)-C(3)-H(3)   | 126.9    |
| C(2)-C(3)-H(3)   | 126.9    |
| N(1)-C(4)-C(3)   | 108.9(4) |
| N(1)-C(4)-C(6)   | 122.9(4) |
| C(3)-C(4)-C(6)   | 128.1(5) |
| N(1)-C(5)-C(2)   | 108.3(4) |
| N(1)-C(5)-C(1)#1 | 126.1(4) |
| C(2)-C(5)-C(1)#1 | 125.6(4) |
| O(2)-C(6)-C(4)   | 119.6(5) |
| O(2)-C(6)-C(7)   | 126.2(6) |
| C(4)-C(6)-C(7)   | 113.8(5) |
| O(2)-C(6)-H(6)   | 92.3     |
| C(4)-C(6)-H(6)   | 92.3     |
| C(7)-C(6)-H(6)   | 92.3     |
| C(8)-C(7)-C(6)   | 110.2(7) |
| C(8)-C(7)-C(9)   | 110.8(6) |
| C(6)-C(7)-C(9)   | 110.8(6) |
| C(8)-C(7)-H(7)   | 108.3    |
| C(6)-C(7)-H(7)   | 108.3    |
| C(9)-C(7)-H(7)   | 108.3    |
| C(7)-C(8)-H(8A)  | 109.5    |
| C(7)-C(8)-H(8B)  | 109.5    |

---

---

|                     |          |
|---------------------|----------|
| H(8A)-C(8)-H(8B)    | 109.5    |
| C(7)-C(8)-H(8C)     | 109.5    |
| H(8A)-C(8)-H(8C)    | 109.5    |
| H(8B)-C(8)-H(8C)    | 109.5    |
| C(7)-C(9)-H(9A)     | 109.5    |
| C(7)-C(9)-H(9B)     | 109.5    |
| H(9A)-C(9)-H(9B)    | 109.5    |
| C(7)-C(9)-H(9C)     | 109.5    |
| H(9A)-C(9)-H(9C)    | 109.5    |
| H(9B)-C(9)-H(9C)    | 109.5    |
| O(2)-C(10)-H(10A)   | 109.5    |
| O(2)-C(10)-H(10B)   | 109.5    |
| H(10A)-C(10)-H(10B) | 109.5    |
| O(2)-C(10)-H(10C)   | 109.5    |
| H(10A)-C(10)-H(10C) | 109.5    |
| H(10B)-C(10)-H(10C) | 109.5    |
| O(3)-C(11)-C(15)#2  | 123.3(3) |
| O(3)-C(11)-C(12)    | 124.1(4) |
| C(15)#2-C(11)-C(12) | 112.6(3) |
| C(15)-C(12)-C(13)   | 107.2(3) |
| C(15)-C(12)-C(11)   | 121.6(3) |
| C(13)-C(12)-C(11)   | 131.1(3) |
| C(14)-C(13)-C(12)   | 107.5(4) |
| C(14)-C(13)-H(13)   | 126.2    |
| C(12)-C(13)-H(13)   | 126.2    |
| N(2)-C(14)-C(13)    | 107.7(3) |
| N(2)-C(14)-C(16)    | 122.1(4) |
| C(13)-C(14)-C(16)   | 130.2(4) |
| N(2)-C(15)-C(12)    | 107.6(3) |
| N(2)-C(15)-C(11)#2  | 126.6(3) |
| C(12)-C(15)-C(11)#2 | 125.8(3) |
| O(4)-C(16)-C(14)    | 112.2(4) |
| O(4)-C(16)-C(17)    | 110.4(5) |
| C(14)-C(16)-C(17)   | 113.7(4) |
| O(4)-C(16)-H(16)    | 106.7    |
| C(14)-C(16)-H(16)   | 106.7    |
| C(17)-C(16)-H(16)   | 106.7    |
| C(18)-C(17)-C(16)   | 115.1(6) |
| C(18)-C(17)-C(19)   | 112.5(6) |
| C(16)-C(17)-C(19)   | 108.8(6) |
| C(18)-C(17)-H(17)   | 106.6    |
| C(16)-C(17)-H(17)   | 106.6    |
| C(19)-C(17)-H(17)   | 106.6    |
| C(17)-C(18)-H(18A)  | 109.5    |
| C(17)-C(18)-H(18B)  | 109.5    |
| H(18A)-C(18)-H(18B) | 109.5    |
| C(17)-C(18)-H(18C)  | 109.5    |

---



---

|                     |       |
|---------------------|-------|
| H(18A)-C(18)-H(18C) | 109.5 |
| H(18B)-C(18)-H(18C) | 109.5 |
| C(17)-C(19)-H(19A)  | 109.5 |
| C(17)-C(19)-H(19B)  | 109.5 |
| H(19A)-C(19)-H(19B) | 109.5 |
| C(17)-C(19)-H(19C)  | 109.5 |
| H(19A)-C(19)-H(19C) | 109.5 |
| H(19B)-C(19)-H(19C) | 109.5 |
| O(4)-C(20)-H(20A)   | 109.5 |
| O(4)-C(20)-H(20B)   | 109.5 |
| H(20A)-C(20)-H(20B) | 109.5 |
| O(4)-C(20)-H(20C)   | 109.5 |
| H(20A)-C(20)-H(20C) | 109.5 |
| H(20B)-C(20)-H(20C) | 109.5 |

---

Symmetry transformations used to generate equivalent atoms: #1  $-x, -y+1, -z$ ; #2  $-x+1, -y, -z$ .

**Table S4.** Anisotropic displacement parameters [A2 × 103] for 1\_0m. The anisotropic displacement factor exponent takes the form:  $-2p^2[(ha^*)^2U_{11} + \dots + 2hka^*b^*U_{12}]$ .

|       | U11     | U22     | U33     | U23      | U13    | U12    |
|-------|---------|---------|---------|----------|--------|--------|
| N(1)  | 55(2)   | 30(2)   | 69(2)   | -5(2)    | 25(2)  | 8(2)   |
| N(2)  | 40(2)   | 37(2)   | 48(2)   | -4(1)    | 17(1)  | 12(1)  |
| O(1)  | 59(2)   | 43(2)   | 69(2)   | 6(1)     | 22(2)  | 23(2)  |
| O(2)  | 85(4)   | 212(9)  | 600(20) | -304(13) | -96(8) | 63(5)  |
| O(3)  | 33(1)   | 48(2)   | 65(2)   | -2(1)    | 15(1)  | 13(1)  |
| O(4)  | 106(3)  | 57(2)   | 116(4)  | 3(2)     | 48(3)  | 23(2)  |
| C(1)  | 42(2)   | 33(2)   | 64(3)   | 2(2)     | 22(2)  | 14(2)  |
| C(2)  | 48(2)   | 33(2)   | 61(2)   | -4(2)    | 21(2)  | 8(2)   |
| C(3)  | 53(2)   | 42(2)   | 60(3)   | -5(2)    | 14(2)  | 10(2)  |
| C(4)  | 50(2)   | 41(2)   | 74(3)   | -10(2)   | 21(2)  | 8(2)   |
| C(5)  | 46(2)   | 29(2)   | 69(3)   | -7(2)    | 26(2)  | 8(2)   |
| C(6)  | 74(3)   | 41(2)   | 77(3)   | -13(2)   | 33(3)  | -7(2)  |
| C(7)  | 125(6)  | 77(4)   | 64(3)   | -25(3)   | -6(3)  | 58(4)  |
| C(8)  | 152(8)  | 184(11) | 277(14) | -157(10) | 154(9) | -83(8) |
| C(9)  | 229(10) | 62(4)   | 69(4)   | -13(3)   | 37(5)  | 46(5)  |
| C(10) | 68(4)   | 96(6)   | 183(9)  | 25(6)    | -20(5) | 9(4)   |
| C(11) | 34(2)   | 37(2)   | 49(2)   | 2(2)     | 15(2)  | 12(2)  |
| C(12) | 36(2)   | 37(2)   | 43(2)   | -2(2)    | 12(2)  | 8(2)   |
| C(13) | 38(2)   | 43(2)   | 58(2)   | -10(2)   | 14(2)  | 5(2)   |
| C(14) | 48(2)   | 39(2)   | 54(2)   | -7(2)    | 17(2)  | 7(2)   |
| C(15) | 40(2)   | 31(2)   | 45(2)   | -2(2)    | 17(2)  | 7(2)   |
| C(16) | 58(3)   | 44(2)   | 70(3)   | -13(2)   | 21(2)  | 7(2)   |
| C(17) | 135(6)  | 71(4)   | 61(3)   | -14(3)   | 35(4)  | 3(4)   |
| C(18) | 195(9)  | 111(6)  | 66(4)   | 4(4)     | 42(5)  | 50(6)  |
| C(19) | 267(12) | 72(4)   | 85(5)   | -38(4)   | 76(6)  | -20(6) |
| C(20) | 149(7)  | 66(4)   | 106(5)  | 20(4)    | 61(5)  | -6(4)  |

**Table S5.** Hydrogen coordinates ( $\times 104$ ) and isotropic displacement parameters ( $A^2 \times 103$ ) for 1\_0m.

|        | <b>x</b> | <b>y</b> | <b>z</b> | <b>U(eq)</b> |
|--------|----------|----------|----------|--------------|
| H(3)   | 2658     | 6296     | 2772     | 64           |
| H(6)   | 2343     | 9631     | 2028     | 78           |
| H(7)   | 180      | 10070    | 2171     | 115          |
| H(8A)  | 257      | 8193     | 3449     | 312          |
| H(8B)  | -1244    | 9035     | 3041     | 312          |
| H(8C)  | 163      | 9518     | 4217     | 312          |
| H(9A)  | 2307     | 11153    | 4385     | 183          |
| H(9B)  | 845      | 11835    | 3631     | 183          |
| H(9C)  | 2518     | 11746    | 3311     | 183          |
| H(10A) | 5531     | 9659     | 2489     | 193          |
| H(10B) | 5094     | 8166     | 2719     | 193          |
| H(10C) | 6025     | 9328     | 3738     | 193          |
| H(13)  | 8535     | 2394     | 1613     | 58           |
| H(16)  | 7890     | 4602     | 2723     | 71           |
| H(17)  | 5077     | 3988     | 3459     | 109          |
| H(18A) | 6554     | 2256     | 3668     | 183          |
| H(18B) | 6593     | 3042     | 4838     | 183          |
| H(18C) | 8181     | 3261     | 4412     | 183          |
| H(19A) | 6633     | 5521     | 5110     | 216          |
| H(19B) | 6358     | 6265     | 4036     | 216          |
| H(19C) | 8124     | 5809     | 4600     | 216          |
| H(20A) | 7744     | 6378     | 1696     | 155          |
| H(20B) | 5956     | 6471     | 848      | 155          |
| H(20C) | 6797     | 5147     | 742      | 155          |
| H(1)   | 3780(50) | 2500(40) | 1340(30) | 25(9)        |
| H(2)   | 260(60)  | 8430(60) | 400(40)  | 55(13)       |

wpy-39

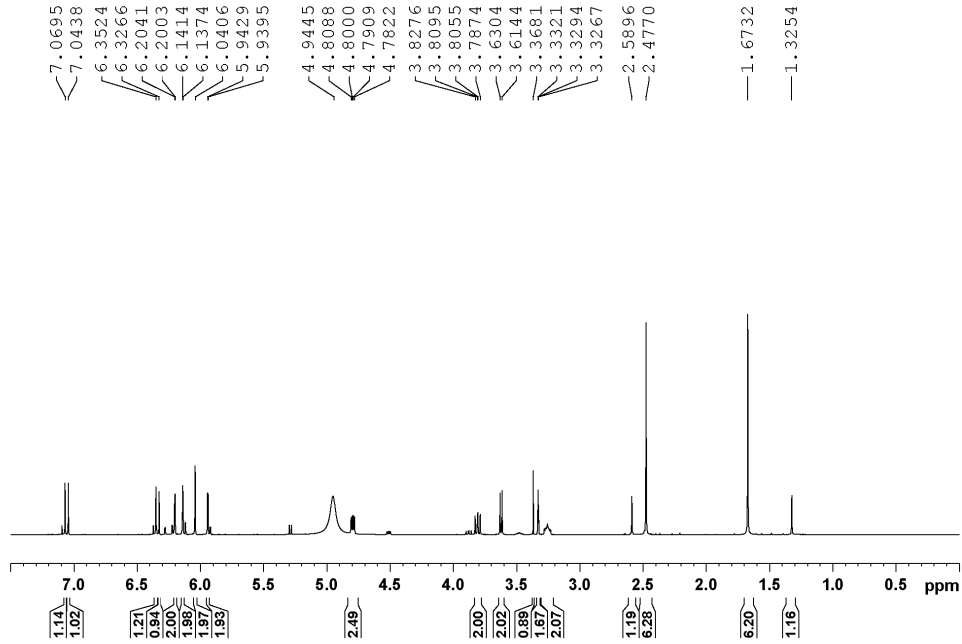

Figure S8. <sup>1</sup>H-NMR of 2.

wpy-39 dept135

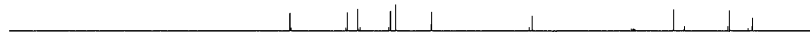

wpy-39 dept90

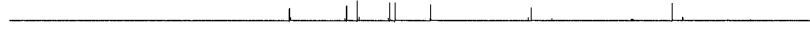

wpy-39

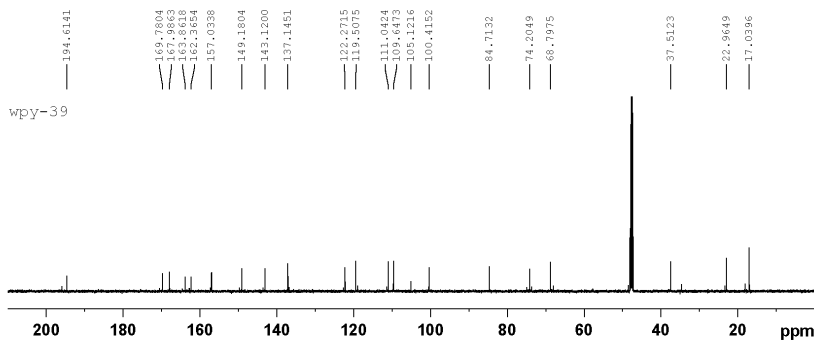

Figure S9. <sup>13</sup>C-NMR of 2.

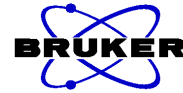

```

NAME          wpy-39
EXPNO         2
PROCNO       2010608
Date_         15.10
INSTRUM      spect
PROBHD       5 mm BBO
PULPROG      zgpg30
TD           65536
SOLVENT      H2O
NS           1024
DS           4
SWH          30057.691 Hz
F2DRHO      0.250187 Hz
AQ          0.9088159 sec
RG          2050
DM          13.967 usec
DE          6.50 usec
TE          297.4 K
D1          2.0000000 sec
D11         0.0300000 sec
TD0         1

===== CHANNEL f1 =====
NUC1         13C
P1          10.56 usec
PL1         -0.00 dB
RF1W       103.8253488 MHz
SFO1       150.9329873 MHz

===== CHANNEL f2 =====
CPDPRG2     waltz16
NUC2         1H
PCPD2       70.00 usec
PL2         -0.00 dB
PL12       13.43 dB
PL13       13.43 dB
PL14       13.43 dB
PL15       12.49519458 dB
PL12W      0.46684502 W
PL13W      0.46684502 W
SFO2       600.1324008 MHz
Z1          32768
SF          150.9178950 MHz
MSB         RM
SSB         0
LB          1.00 Hz
GB          0
PC          1.40
    
```





## Mass Spectrum SmartFormula Report

### Analysis Info

Analysis Name D:\Data\wpy-39\_000004.d  
 Method LCMS\_Runing-20131122  
 Sample Name

Acquisition Date 2013-12-8 17:18:54

Operator ChuanqiZhou@163.com  
 Instrument apex-Ultra

### Acquisition Parameter

|                          |            |                         |                    |                       |                          |
|--------------------------|------------|-------------------------|--------------------|-----------------------|--------------------------|
| Polarity                 | Positive   | Source                  | ESI                | No. of Laser Shots    | 20                       |
| Averaged Scans           | 2          | No. of Cell Fills       | 1                  | Laser Power           | 51.0 %                   |
| Broadband Low Mass       | 100.3 m/z  | End Plate               | 3500.0 V           | MALDI Plate           | 300.0 V                  |
| Broadband High Mass      | 1200.0 m/z | Capillary Entrance      | 4000.0 V           | Imaging Spot Diameter | 2000.0 $\mu$ m           |
| Acquisition Mode         | Single MS  | Skimmer 1               | 20.0 V             |                       |                          |
| Pulse Program            | basic      | Drying Gas Temperature  | 180.0 $^{\circ}$ C | Calibration Date      | Sun Dec 8 04:39:50 2013  |
| Source Accumulation      | 0.0 sec    | Drying Gas Flow Rate    | 4.0 L/min          | Data Acquisition Size | 131072                   |
| Ion Accumulation Time    | 0.1 sec    | Nebulizer Gas Flow Rate | 1.0 L/min          | Apodization           | Sine-Bell Multiplication |
| Flight Time to Acq. Cell | 0.0 sec    |                         |                    |                       |                          |

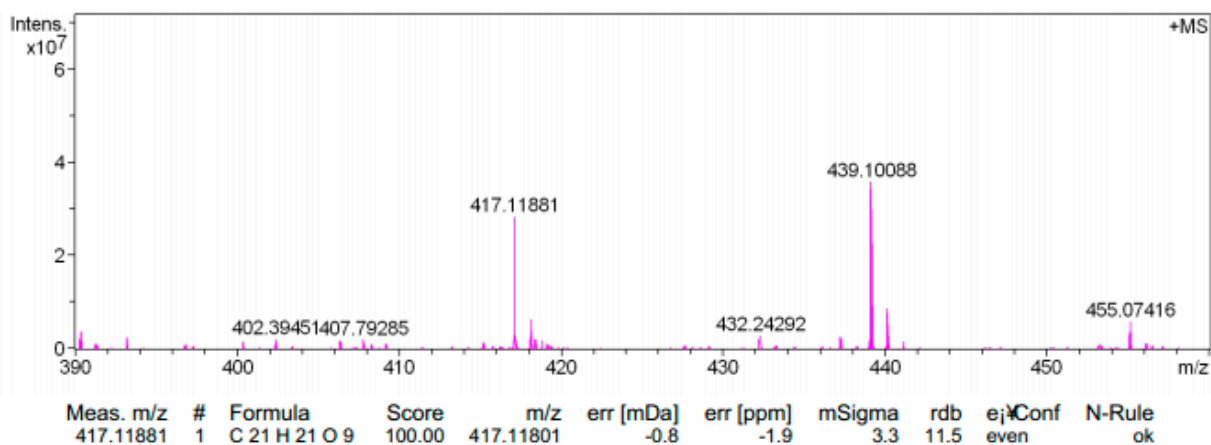

Figure S14. Mass Spectrum Smart Formula Report of 2.

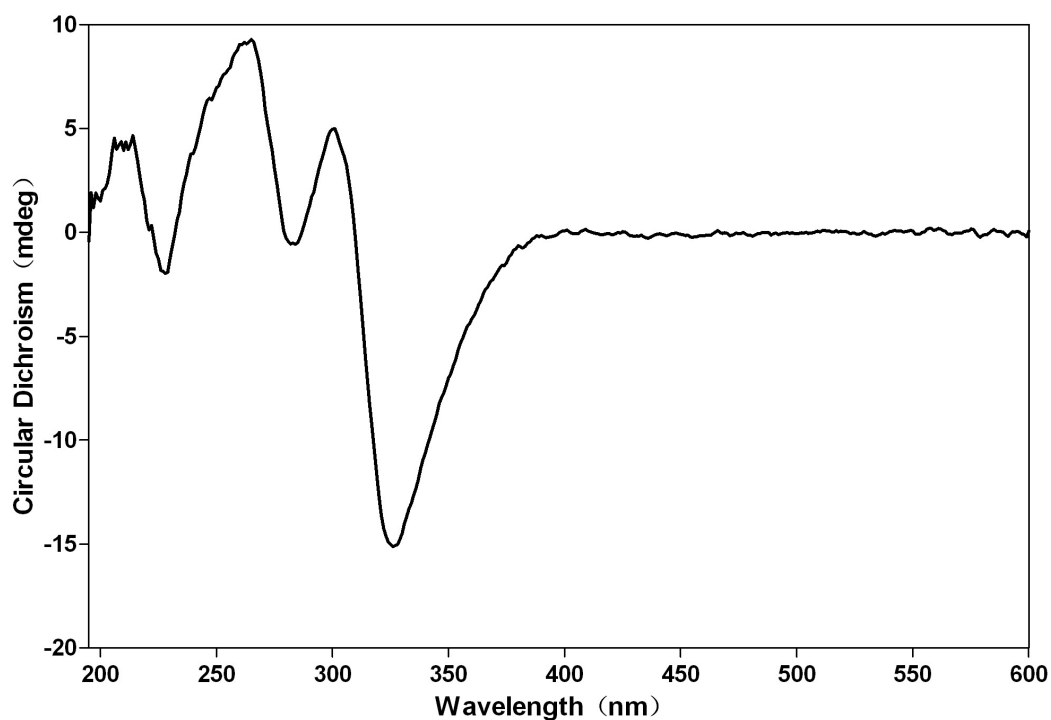

Figure S15. The circular dichroism (CD) spectrum of 2.

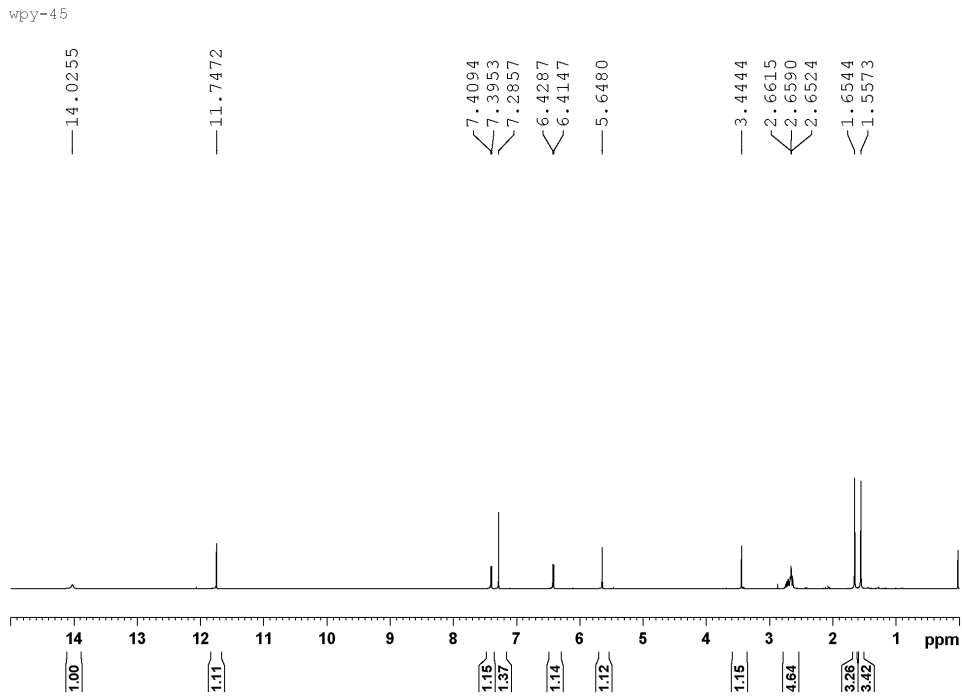

Figure S16. <sup>1</sup>H-NMR of 3.

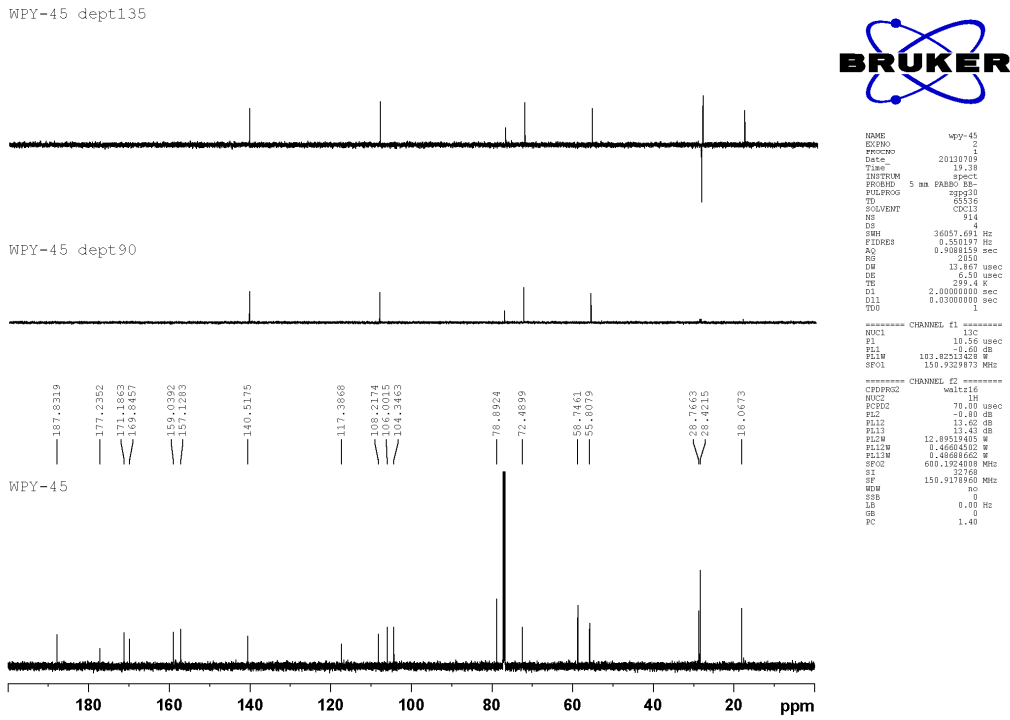

Figure S17. <sup>13</sup>C-NMR of 3.







## Elemental Composition Report

Page 1

## Single Mass Analysis

Tolerance = 10.0 PPM / DBE: min = -10.0, max = 120.0

Selected filters: None

Monoisotopic Mass, Odd and Even Electron Ions

22 formula(e) evaluated with 1 results within limits (up to 51 closest results for each mass)

Elements Used:

C: 0-200 H: 0-400 N: 1-1 O: 8-11

WPY45

12:23:40 14-Jul-2014

Voltage EI+

KIB  
M140714EA-08AFAMM 19 (1.744)  
421.1012

Autospec Premier

P776

1

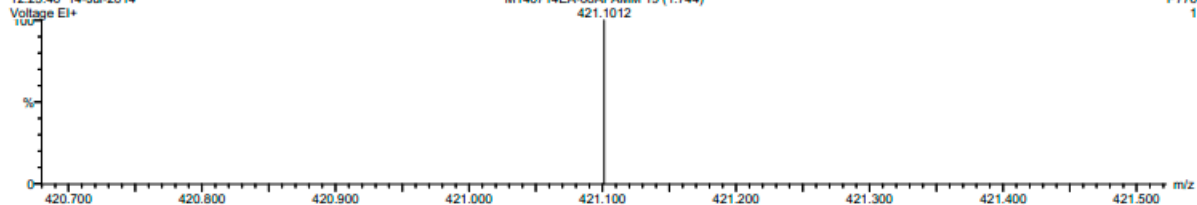Minimum: -10.0  
Maximum: 200.0 10.0 120.0

| Mass     | Calc. Mass | mDa | PPM | DBE  | i-FIT     | Formula       |
|----------|------------|-----|-----|------|-----------|---------------|
| 421.1012 | 421.1009   | 0.3 | 0.7 | 11.0 | 5546025.5 | C19 H19 N O10 |

Figure S22. Single Mass Analysis of 3.

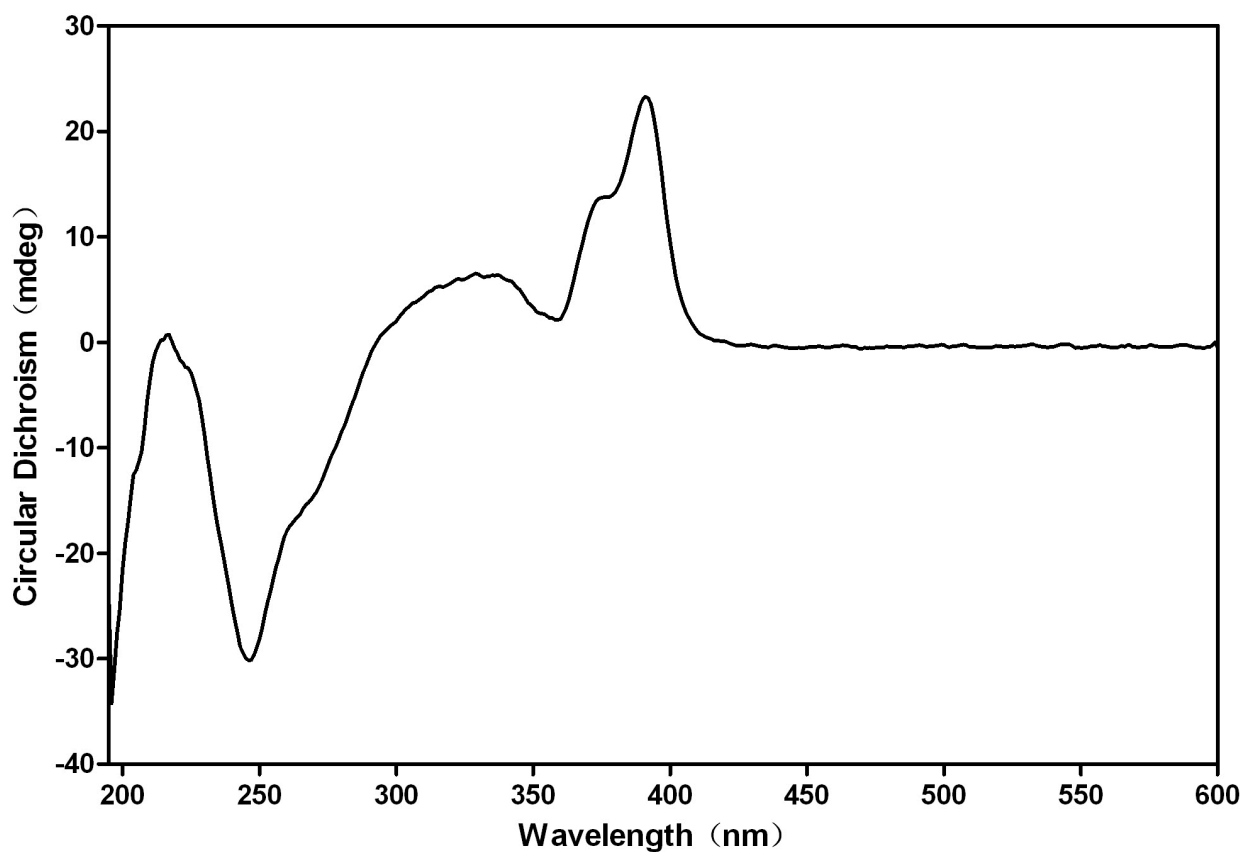

Figure S23. The circular dichroism (CD) spectrum of 3.
